# Supplementary material
Source: PubMed Central journal article supplement (PMC4997247)
Supplement: thnov06p1934s1.pdf [file thnov06p1934s1.pdf]

Supplementary Table 1: Differential protein candidates in small-for-size graft group identified by Mass Spectrometry

|                                           | Accession No. | Protein Score | Protein Score C.I. % | Protein MW(KDa) |
|-------------------------------------------|---------------|---------------|----------------------|-----------------|
| <b>Down-regulation</b>                    |               |               |                      |                 |
| Glutathione Peroxidase 3 (GPx3)           | GI:6723180    | 243           | 100                  | 25.65           |
| complement component 1 gamma              | GI:114554613  | 162           | 100                  | 25.95           |
| complement component 4                    | GI:158537756  | 195           | 100                  | 193.6           |
| <b>Up-regulation</b>                      |               |               |                      |                 |
| Nucleoside diphosphate kinase A           | GI:19924089   | 209           | 100                  | 17.29           |
| Serum amyloid P-component precursor (SAP) | GI:148747488  | 290           | 100                  | 26.27           |
| Nitrilase homolog 1                       | GI:51702765   | 76            | 99.95                | 32.69           |
| delta-aminolevulinic acid dehydratase     | GI:6978483    | 170           | 100                  | 36.46           |
| Complement component factor h-like 1      | GI:112984278  | 101           | 100                  | 31.57           |

The protein score is calculated for each possible candidate from the MASS Spectrum. It indicated the possibility that the identified protein candidates are precise.

Protein score C.I. % is the statistical analysis of the confidence level of the Protein Score. The closer it is to 100%, the higher the possibility that the protein candidate is precisely identified.

Protein MW indicates Molecular Weight.

The expression of GPx3 in small-for-size liver graft group was down-regulated more than 2-folds compared with whole graft group.

Supplementary Table 2: Cox proportional hazard regression model for overall survival analysis

|                         | Univariable analysis |          |
|-------------------------|----------------------|----------|
|                         | HR(95%CI)            | <i>P</i> |
| Plasma GPx3 (Day 1)     |                      |          |
| Low vs High level       | 7.237 (2.416-21.676) | 0.000*   |
| Plasma GPx3 (Day 7)     |                      |          |
| Low vs High level       | 3.240 (1.152-9.115)  | 0.026*   |
| UCSF criteria           |                      |          |
| Beyond vs Within        | 2.585 (1.151-5.802)  | 0.021*   |
| Milan criteria          |                      |          |
| Beyond vs Within        | 1.549 (0.695-3.455)  | 0.285    |
| Venous infiltration     |                      |          |
| Presence vs Absence     | 1.498 (0.957-2.345)  | 0.077    |
| Number of tumor nodules |                      |          |
| ≥3 vs <3                | 2.660 (1.163-6.086)  | 0.020*   |
| Tumor size              |                      |          |
| ≥5 cm vs <5 cm          | 1.580 (0.623-4.010)  | 0.336    |
| AFP                     |                      |          |
| ≥20ng/mL vs <20ng/mL    | 1.724 (0.737-4.034)  | 0.209    |

\*Statistical significance HR: Hazard Ratio CI: Confidence Interval

## Supplementary Figure 1

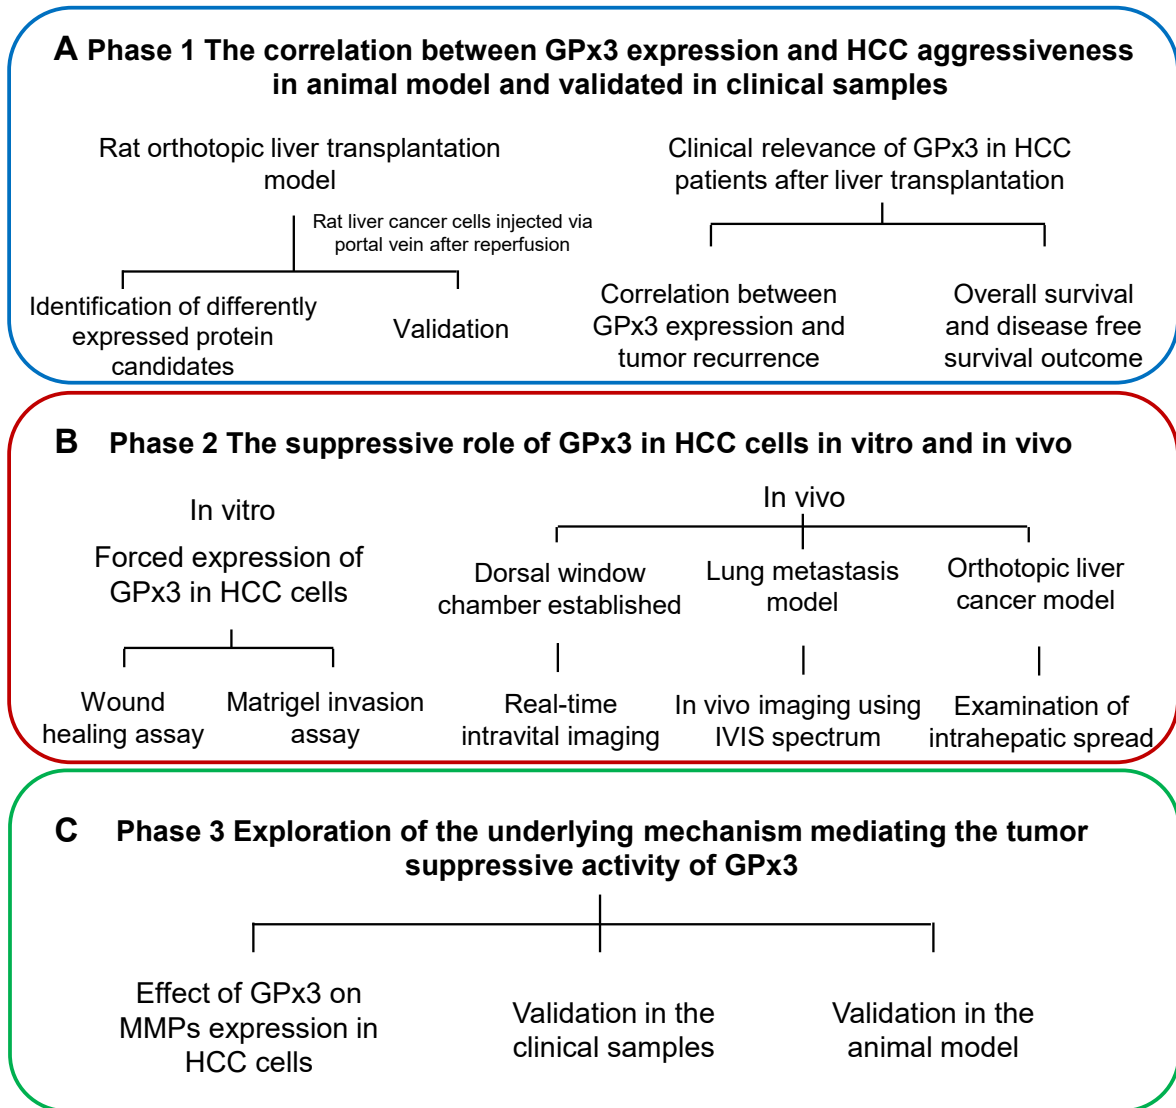

Fig. S1. The diagram showed the study design.

Supplementary Figure 2

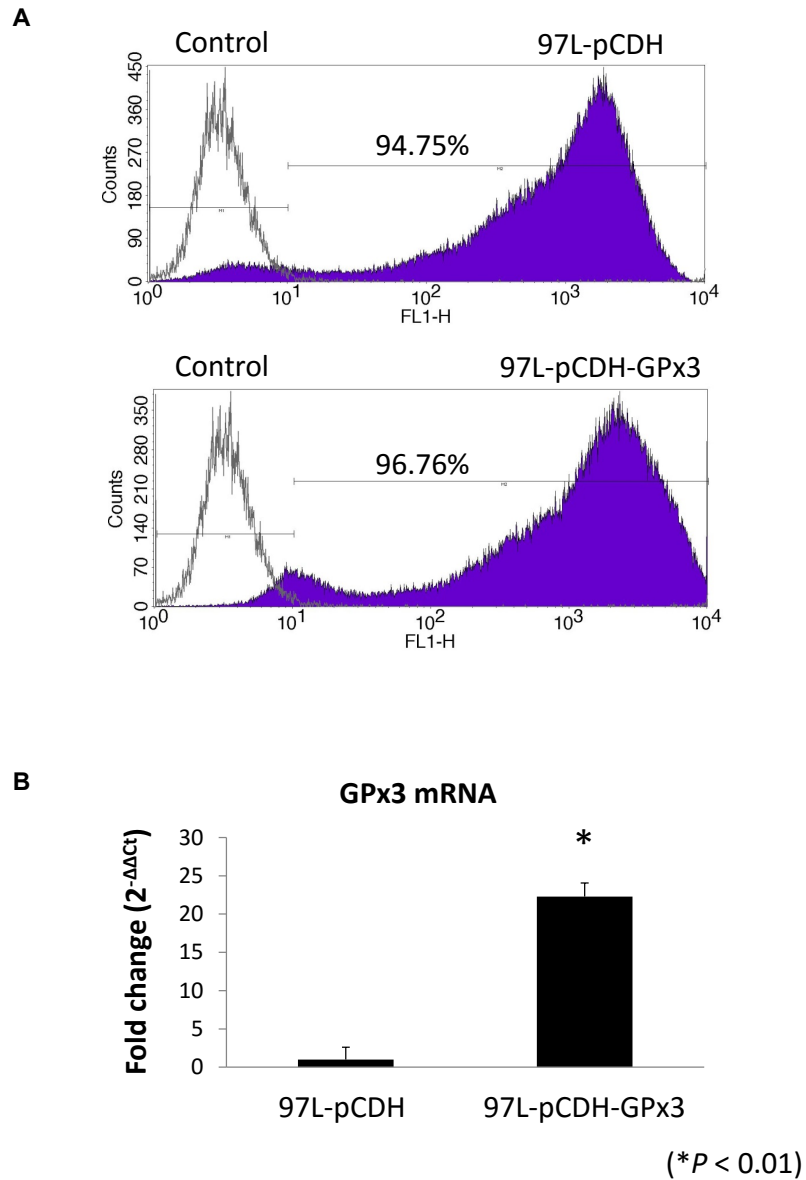

**Fig. S2. Over-expression of GPx3 was established in HCC cells.** (A) The transduction efficiency was more than 90% confirmed by flow cytometry. (B) The expression of GPx3 was 20 times higher after transduction and selection.

Supplementary Figure 3

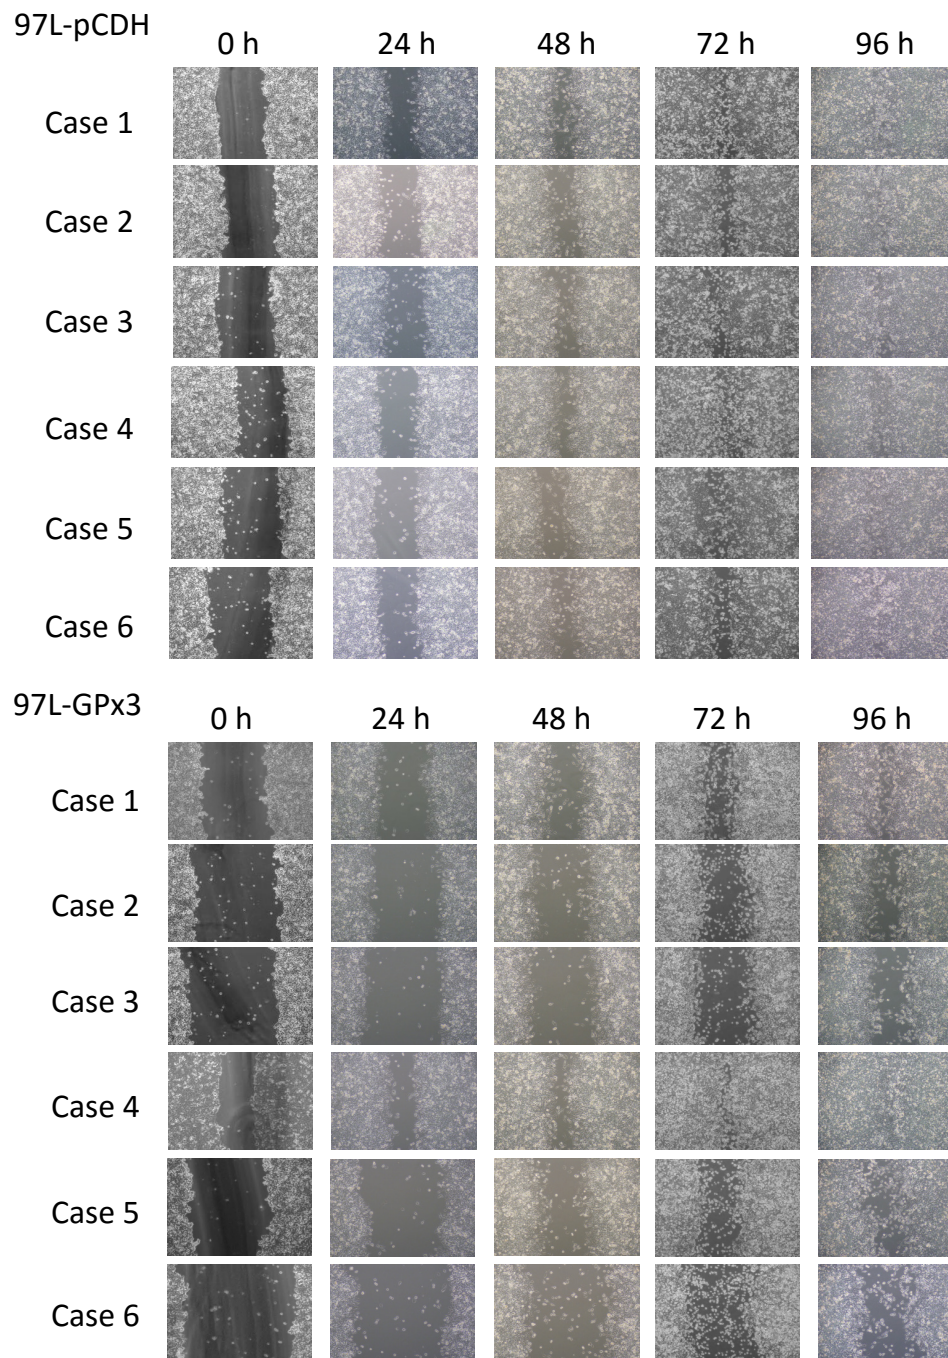

**Fig. S3. Over-expression of GPx3 significantly suppressed the migration of GPx3 in wound healing assay. The experiment was repeated for six times.**

Supplementary Figure 4

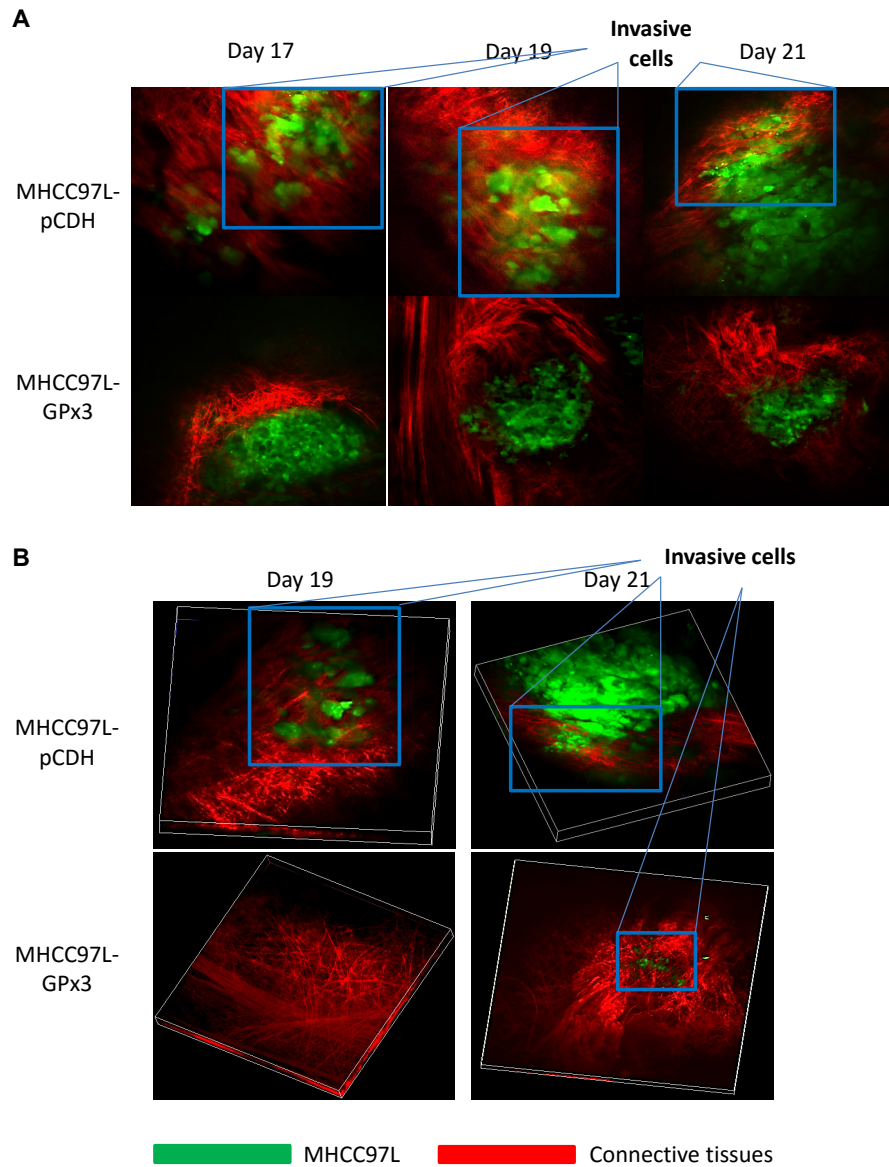

**Fig. S4. Real-time intravital imaging showed that over-expression of GPx3 suppressed HCC invasiveness at different time points after inoculation.** (A) More HCC cells invaded into surrounding connective tissues in the control group. In the contrast, the HCC cells with over-expression of GPx3 remained relatively intact. (B) Three-dimension reconstructed images showed that over-expression of GPx3 significantly suppressed HCC invasiveness in Z-axis at later time points in a live animal.

## Supplementary Figure 5

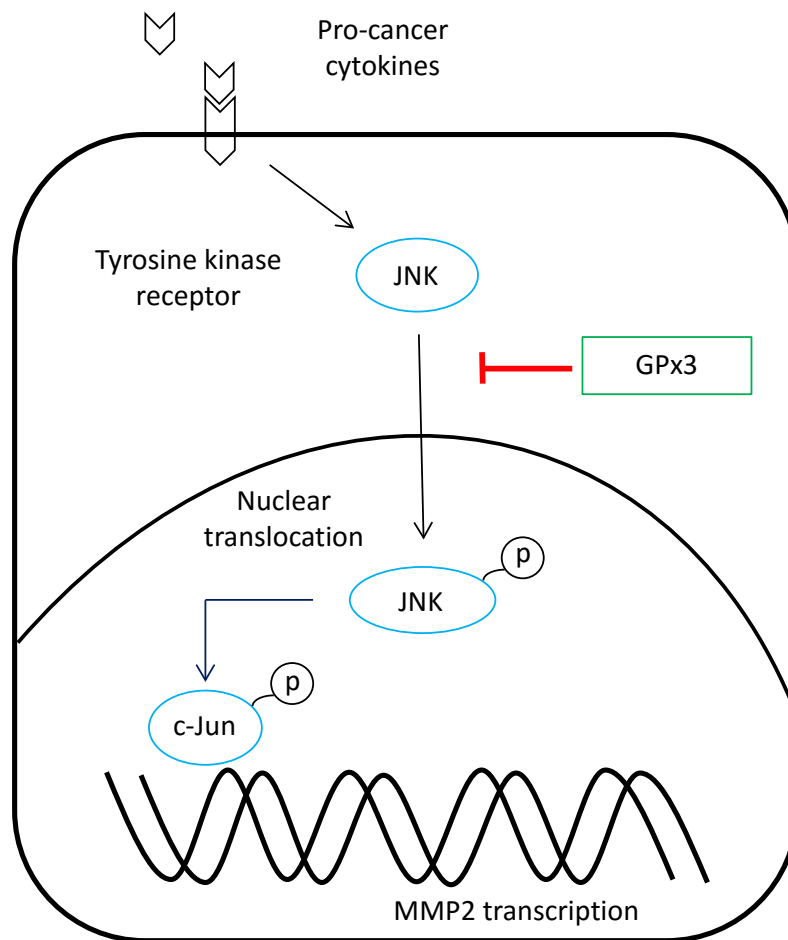

**Fig. S5. Diagram showing the mechanism of suppressive effect of GPx3 mediated through JNK-cJun-MMP2 signaling pathway.**



Supplementary Figure 6

Case 1099

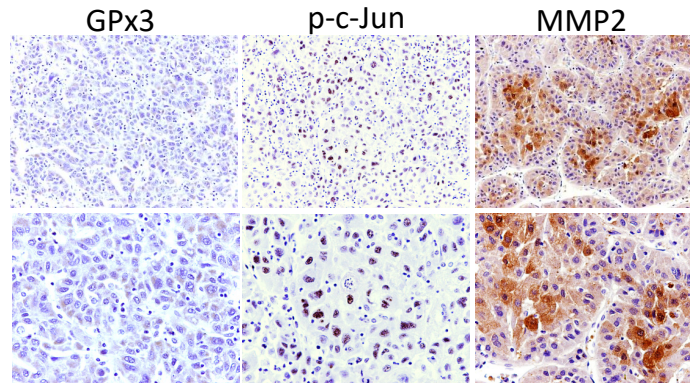

Case 1139

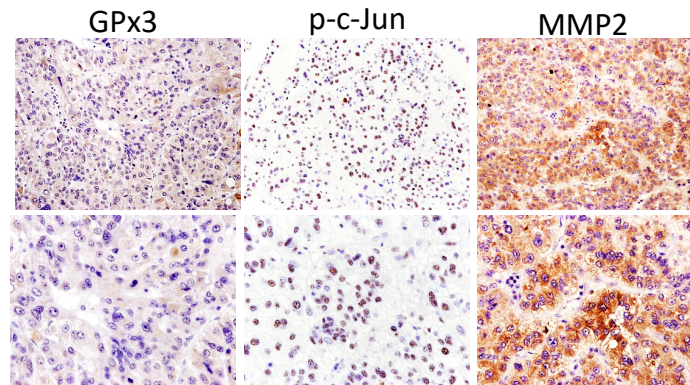

Case 1263

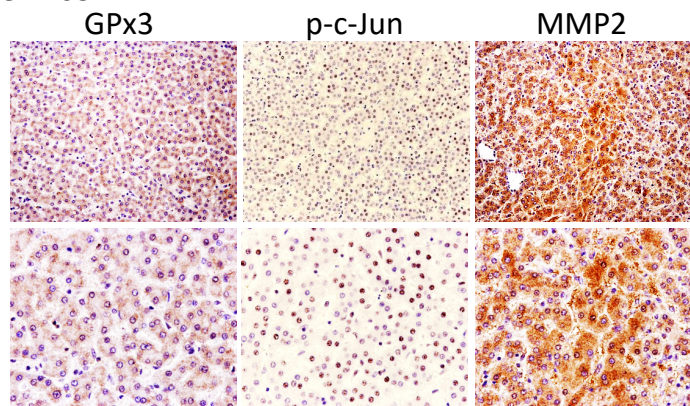

**Fig. S6. The representative images showing the negative correlation between MMP2 and GPx3 expression within tumor tissues collected from HCC patients during liver transplantation. The activation of c-Jun and expression of MMP2 was consistently higher while the GPx3 expression was relatively lower.**



Supplementary Figure 7

Case 1034

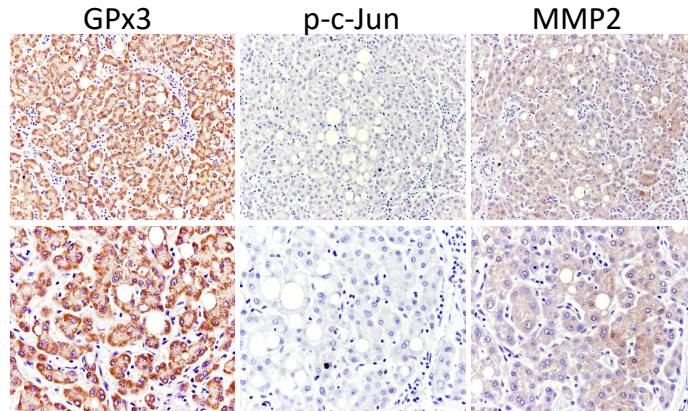

Case 1126

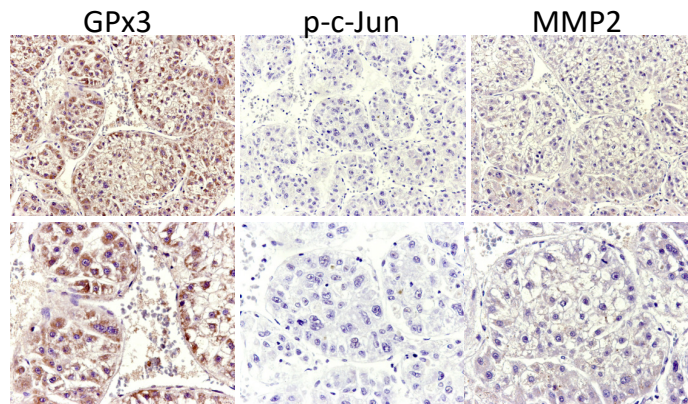

Case 1368

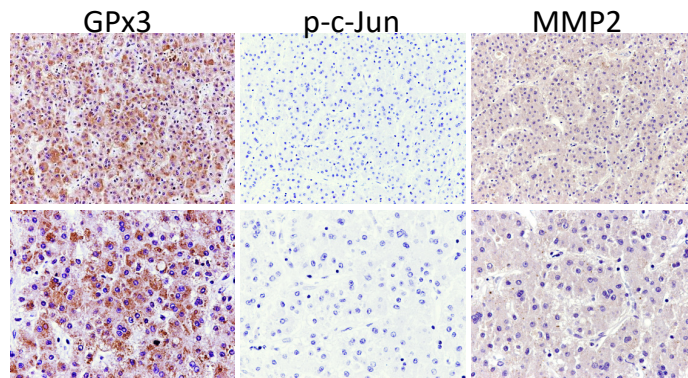

**Fig. S7. The representative images showing the negative correlation between MMP2 and GPx3 expression within tumor tissues collected from HCC patients during liver transplantation. The activation of c-Jun and expression of MMP2 was consistently lower while the GPx3 expression was significantly higher.**

**Movie. S1. Reconstructed 3D image showing HCC invasiveness occurred as early as 2 week after tumor cells inoculation in Control group.** Red: connective tissue surrounding tumor. Green: tumor tissue.

**Movie. S2. Reconstructed 3D image showing HCC invasiveness was significantly inhibited at day 14 after tumor cells inoculation in GPx3 over-expression group.** Red: connective tissue surrounding tumor. Green: tumor tissue.

**Movie. S3. Reconstructed 3D image showing HCC invasiveness at day 19 after tumor cells inoculation in Control group.** Red: connective tissue surrounding tumor. Green: tumor tissue.

**Movie. S4. Reconstructed 3D image showing HCC invasiveness was significantly inhibited at day 19 after tumor cells inoculation in GPx3 over-expression group.** Red: connective tissue surrounding tumor. Green: tumor tissue.
